# Supplementary material for: Feminization of Male Mouse Liver by Persistent Growth Hormone Stimulation: Activation of Sex-Biased Transcriptional Networks and Dynamic Changes in Chromatin States
Source: PubMed Central journal article supplement (PMC5599723; doi:10.1128/mcb.00301-17), 2017-09-12

## Supplemental Figures and Tables

### **Feminization of male mouse liver by persistent growth hormone stimulation: Activation of sex-biased transcriptional networks and dynamic changes in chromatin states**

Dana Lau-Corona, Alexander Suvorov and David J. Waxman\*

*All supplemental figures can be found in this pdf. Supplemental tables, in Excel format can be found as Tables S1-S8.*

#### **Supplemental Figures**

**Figure S1** - Analysis of intronic reads from PolyA+ selected RNA-seq

**Figure S2** - H3K27me3 abundance on female-biased genes

#### **Supplemental Tables**

**Table S1** - Differential expression analysis for 983 Liver Sex biased genes (FPKM >1, EdgeR Adjusted  $p < 0.01$ ) based on PolyA+ RNA-seq Exon collapsed counts.

**Table S2** – Characterization of 113 Male-biased genes (FPKM >1, EdgeR  $p < 0.01$ , FC >2) based on their response to continuous GH infusion and their transcriptional and epigenetic regulation.

**Table S3** - Characterization of 142 Female-biased genes (FPKM >1, EdgeR  $p < 0.01$ , FC >2) based on their response to continuous GH infusion and their transcriptional and epigenetic regulation.

**Table S4** – Differential expression analysis for 62 Stringent sex-independent genes (FPKM >1, EdgeR  $p > 0.1$ , FC <1.2) that are responsive to continuous GH (EdgeR  $p < 0.05$ , FC >2).

**Table S5** – Transcription factor binding sites and DNase Hypersensitive sites (DHS) associated to 7,225 Stringent sex-independent genes (FPKM >1, EdgeR  $p > 0.1$ , FC <1.2).

**Table S6** - Primer sequences used for qPCR analysis.

**Table S7** – KEGG Pathway analysis.

**Table S8** - Differential expression analysis for 226 sex-biased genes with sufficient intronic read counts from rRNA-depleted RNA-seq libraries.

## Supplemental Figure Legends

### **Figure S1. Analysis of intronic sequence reads from PolyA+ selected RNA-seq**

(A) Percentage of intronic reads in PolyA+ RNA-seq compared to Total (rRNA depleted) RNA-seq. Shown are the values for the same Male and Female liver samples. (B) Heatmaps showing the Log<sub>2</sub> ratios of the expression values for the control females and the cGH treated males at each time point, over the expression values of the sham-treated males, obtained from exonic and intronic read counts from PolyA+ RNA-seq for the 113 male-biased and the 142 female-biased genes.

### **Figure S2. H3K27me3 abundance on female-biased genes**

UCSC genome browser screenshots from H3K27me3 ChIP-seq data for male and female mouse liver (29) on the following female-biased genes (A) *Cux2*, (B) *Cyp3a16*, (C) *A1bg* and (D) *Cyp2b9*

A

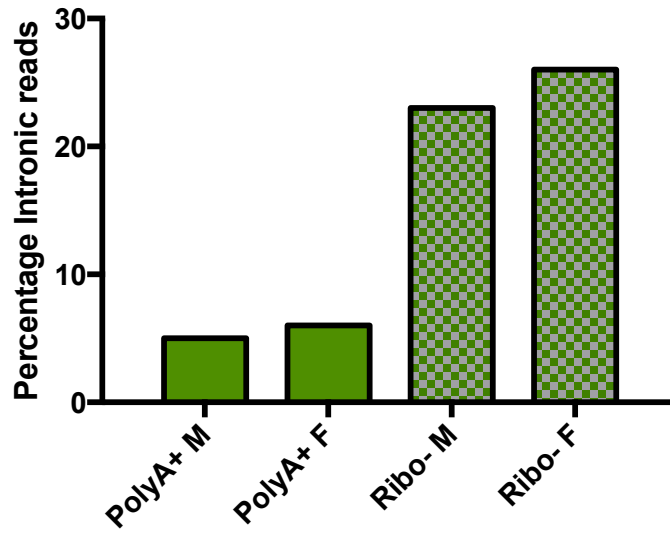

B

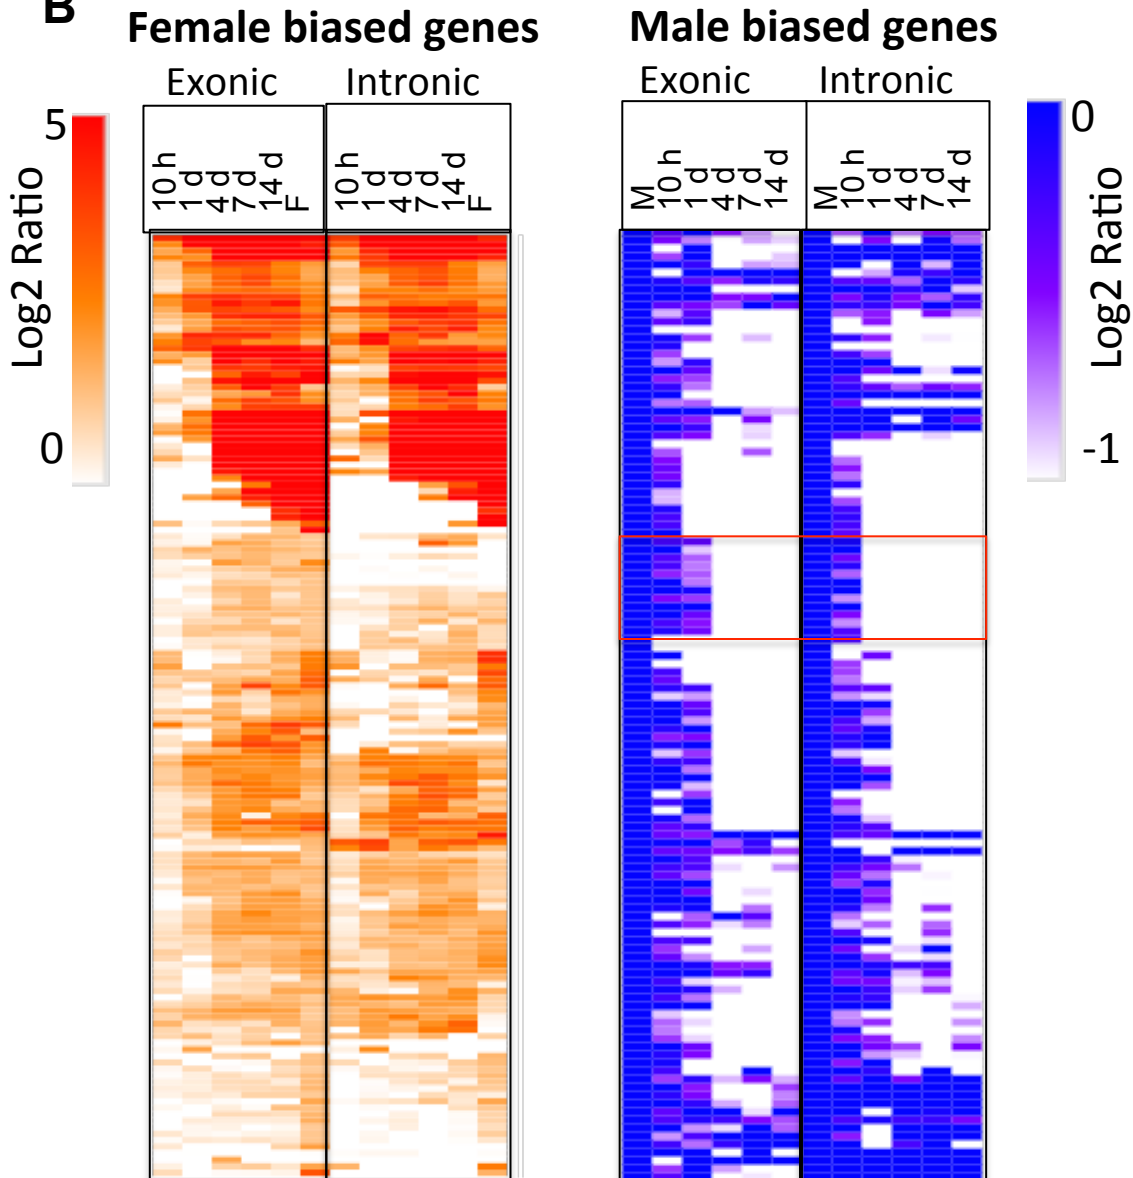

**A. *Cux2***

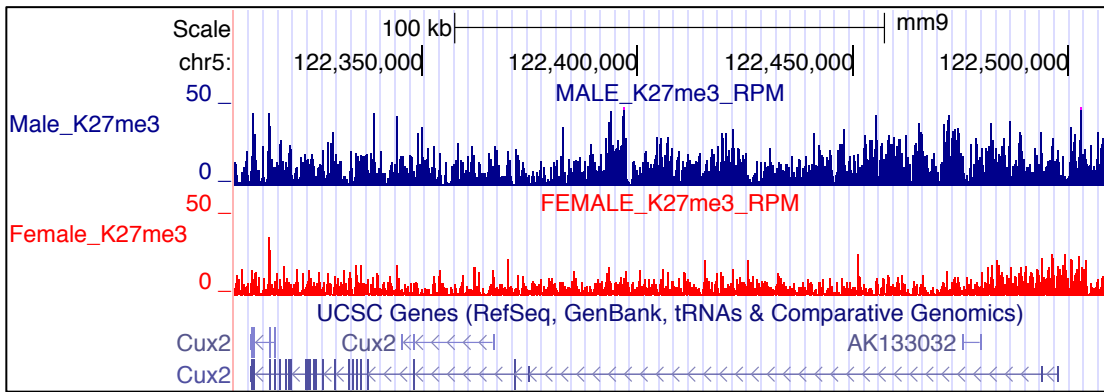

**B. *Cyp3a16***

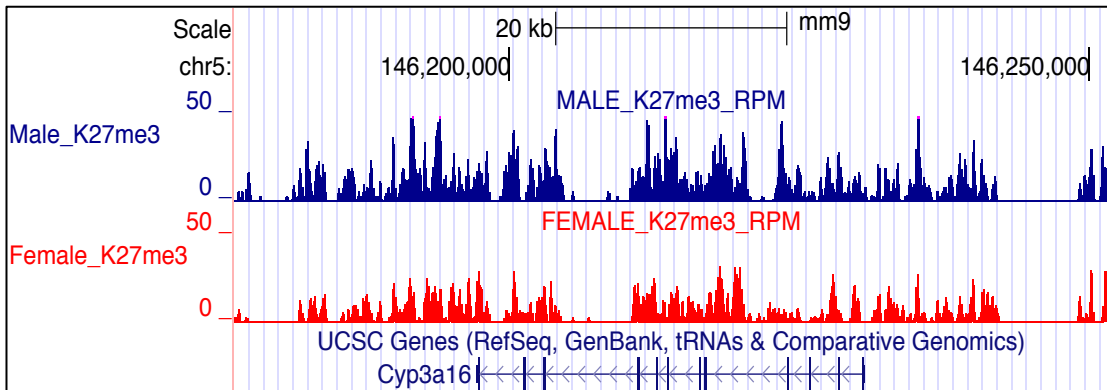

**C. *A1bg***

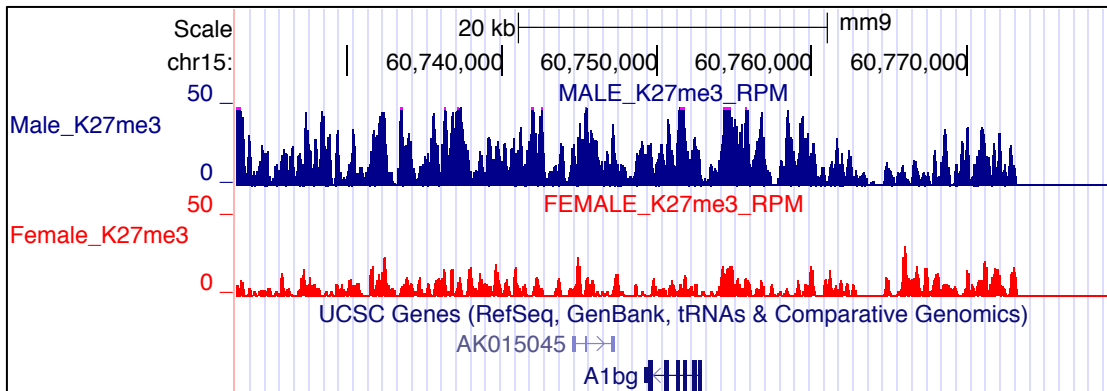

**D. *Cyp2b9***

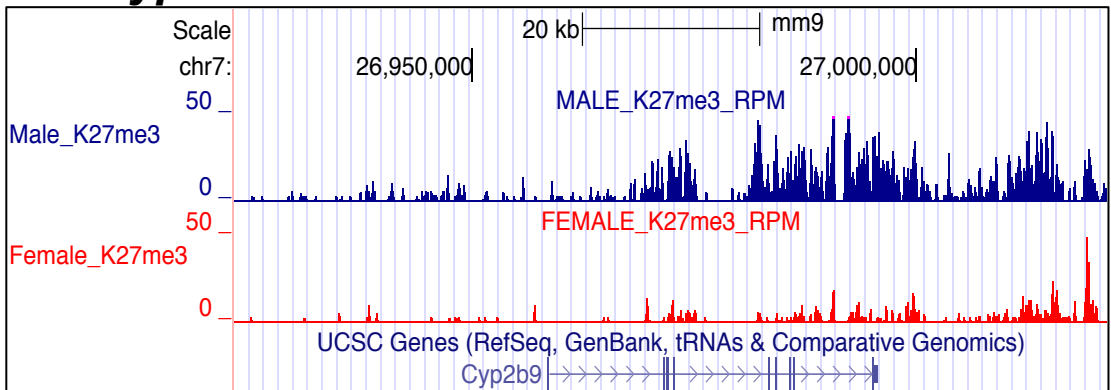

Supplement: MCB.00301-17_zmb999101604s1.pdf [file MCB.00301-17_zmb999101604s1.pdf]
